# Supplementary material for: Trends in and disparities for acute myocardial infarction: an analysis of Medicare claims data from 1992 to 2010
Source: PubMed Central journal article supplement (PMC4212130; doi:10.1186/s12916-014-0190-6), 2014-10-24

**Additional file 6. Procedural Utilization During the Index Admission for initial AMI Adjusted for Patient Age and Comorbidities, and Clustering of Patients within Hospitals**

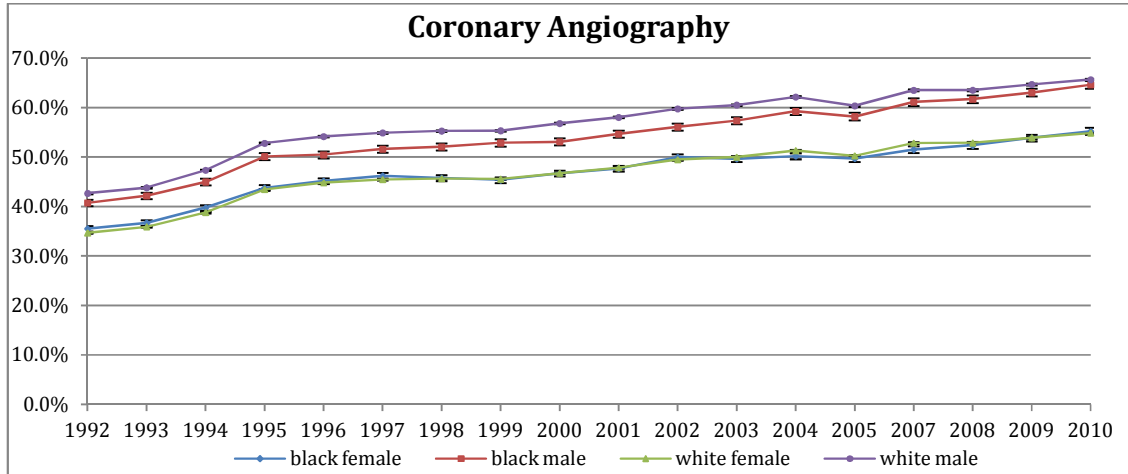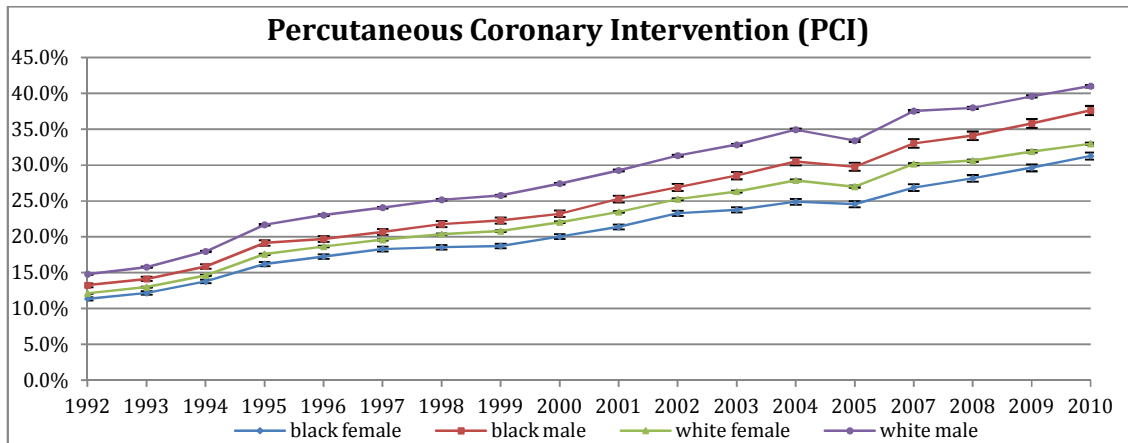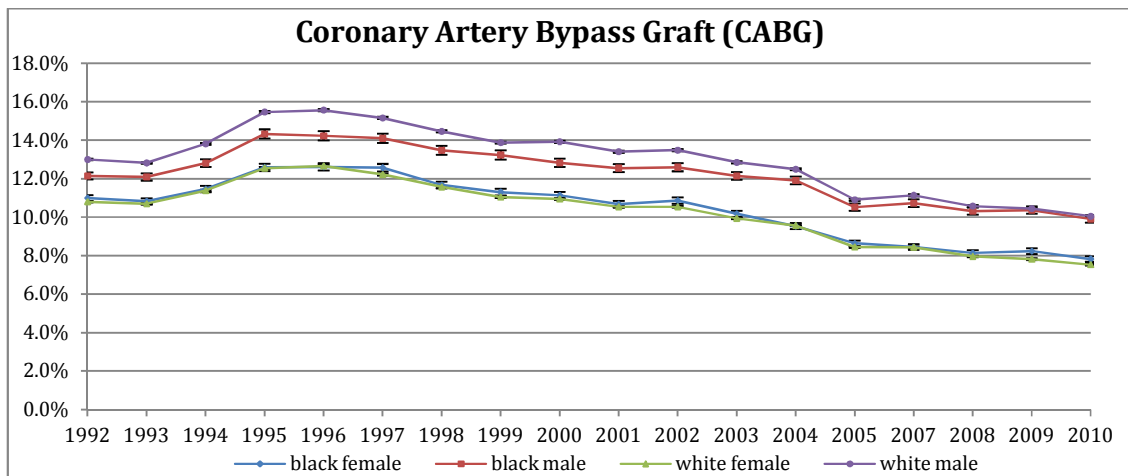

Supplement: 12916_2014_190_MOESM6_ESM.pdf [file 12916_2014_190_MOESM6_ESM.pdf]
