# Supplementary material for: Trends in and disparities for acute myocardial infarction: an analysis of Medicare claims data from 1992 to 2010
Source: Springer Nature journal article supplement (doi:10.1186/s12916-014-0190-6), 2014-10-22

**Additional file 1.** Flow Chart showing patient selection for AMI cohort for our study

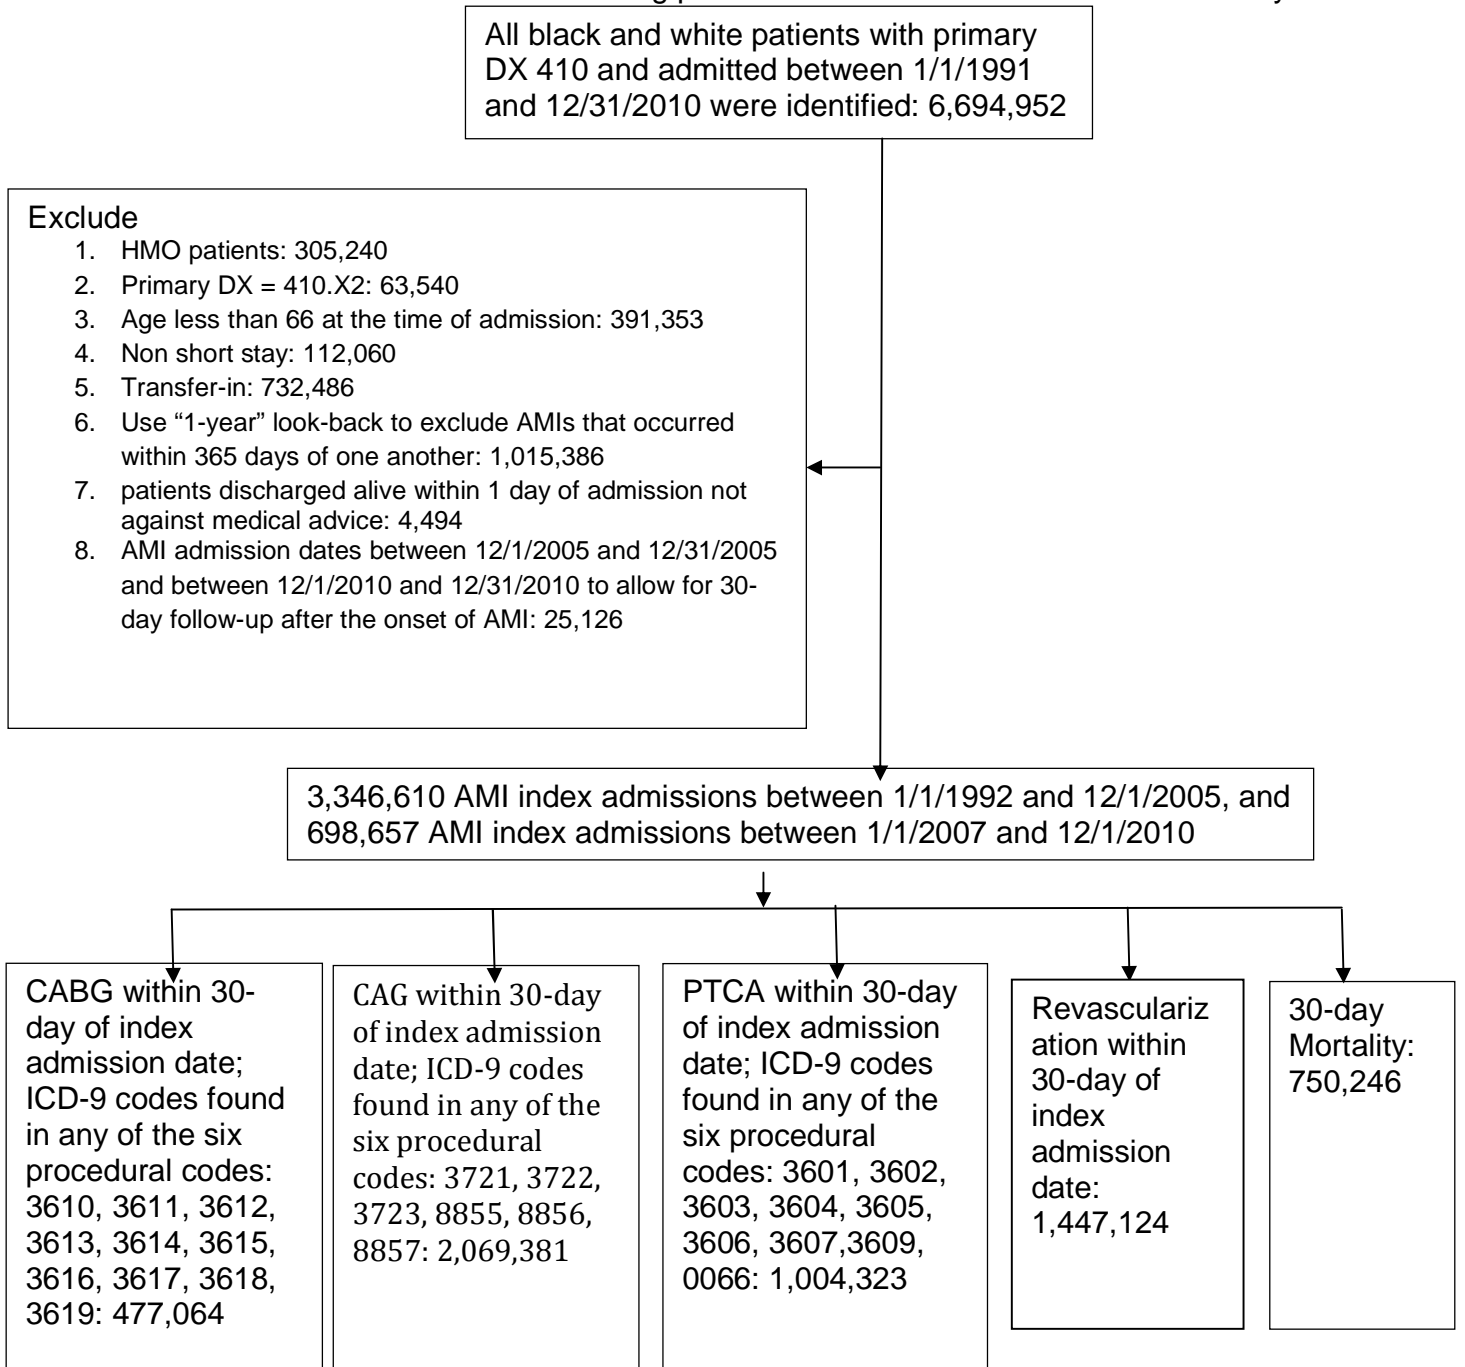

Supplement: MOESM1 [file 9758534]
