# Supplementary material for: Trends in and disparities for acute myocardial infarction: an analysis of Medicare claims data from 1992 to 2010
Source: Springer Nature journal article supplement (doi:10.1186/s12916-014-0190-6), 2014-10-22
Supplement: MOESM2 [file 9758534]

**Additional file 2.** Percentage of White and Black Men and Women who underwent Coronary Angiography within 30-day of admission for AMI

|                                                                                                                                                                  | <b>BLACK FEMALE</b> | <b>BLACK MALE</b> | <b>WHITE FEMALE</b> | <b>WHITE MALE</b> |
|------------------------------------------------------------------------------------------------------------------------------------------------------------------|---------------------|-------------------|---------------------|-------------------|
| <b>Number (%)</b>                                                                                                                                                |                     |                   |                     |                   |
| <b>Percent of all Coronary Angiography in 30-day period that were performed during the initial AMI admission<sup>2</sup></b>                                     |                     |                   |                     |                   |
| 1992-1993                                                                                                                                                        | 3456 (73.4)         | 3193 (73.2)       | 46938 (62.5)        | 68346 (64.0)      |
| 1994-1995                                                                                                                                                        | 4544 (73.7)         | 4013 (74.4)       | 55723 (62.5)        | 80312 (64.8)      |
| 1996-1997                                                                                                                                                        | 5260 (74.1)         | 4500 (73.9)       | 63176 (64.3)        | 86863 (66.2)      |
| 1998-1999                                                                                                                                                        | 5560 (73.5)         | 4674 (75.3)       | 66205 (66.2)        | 87498 (67.9)      |
| 2000-2001                                                                                                                                                        | 6486 (75.7)         | 5245 (75.4)       | 73240 (68.1)        | 94081 (69.8)      |
| 2002-2003                                                                                                                                                        | 7465 (77.6)         | 6074 (78.3)       | 80892 (72.2)        | 103264 (74.1)     |
| 2004-2005                                                                                                                                                        | 6759 (80.9)         | 5869 (81.9)       | 74730 (77.0)        | 95221 (78.9)      |
| 2007-2008                                                                                                                                                        | 6521 (83.6)         | 5826 (84.6)       | 72270 (82.3)        | 93147 (84.2)      |
| 2009-2010                                                                                                                                                        | 6791 (86.3)         | 5887 (87.0)       | 66669 (84.7)        | 88275 (86.5)      |
| <b>Percent of all Coronary Angiography in 30-day period that were performed after transfer to another hospital<sup>2</sup></b>                                   |                     |                   |                     |                   |
| 1992-1993                                                                                                                                                        | 965 (20.5)          | 917 (21.0)        | 22790 (30.3)        | 31209 (29.2)      |
| 1994-1995                                                                                                                                                        | 1267 (20.5)         | 1114 (20.7)       | 27373 (30.7)        | 36084 (29.1)      |
| 1996-1997                                                                                                                                                        | 1448 (20.4)         | 1278 (21.0)       | 28882 (29.4)        | 36784 (28.0)      |
| 1998-1999                                                                                                                                                        | 1586 (21.0)         | 1231 (19.8)       | 27720 (27.7)        | 34244 (26.6)      |
| 2000-2001                                                                                                                                                        | 1662 (19.4)         | 1346 (19.4)       | 28168 (26.2)        | 33698 (25.0)      |
| 2002-2003                                                                                                                                                        | 1719 (17.9)         | 1335 (17.2)       | 25631 (22.9)        | 29906 (21.5)      |
| 2004-2005                                                                                                                                                        | 1249 (15.0)         | 996 (13.9)        | 18115 (18.7)        | 20508 (17.0)      |
| 2007-2008                                                                                                                                                        | 980 (12.6)          | 783 (11.4)        | 11981 (13.7)        | 13193 (11.9)      |
| 2009-2010                                                                                                                                                        | 804 (10.2)          | 612 (9.0)         | 9070 (11.5)         | 10254 (10.0)      |
| <b>Percent of all Coronary Angiography in 30-day period that were performed during a different admission (but within 30-day of the onset of AMI)<sup>2</sup></b> |                     |                   |                     |                   |
| 1992-1993                                                                                                                                                        | 286 (6.1)           | 252 (5.8)         | 5406 (7.2)          | 7274 (6.8)        |
| 1994-1995                                                                                                                                                        | 358 (5.8)           | 264 (4.9)         | 6001 (6.7)          | 7602 (6.1)        |
| 1996-1997                                                                                                                                                        | 393 (5.5)           | 308 (5.1)         | 6170 (6.3)          | 7621 (5.8)        |
| 1998-1999                                                                                                                                                        | 417 (5.5)           | 304 (4.9)         | 6068 (6.1)          | 7138 (5.5)        |
| 2000-2001                                                                                                                                                        | 417 (4.9)           | 364 (5.2)         | 6076 (5.7)          | 6927 (5.1)        |
| 2002-2003                                                                                                                                                        | 439 (4.6)           | 348 (4.5)         | 5523 (4.9)          | 6246 (4.5)        |
| 2004-2005                                                                                                                                                        | 348 (4.2)           | 303 (4.2)         | 4237 (4.4)          | 4991 (4.1)        |
| 2007-2008                                                                                                                                                        | 298 (3.8)           | 274 (4.0)         | 3520 (4.0)          | 4248 (3.8)        |
| 2009-2010                                                                                                                                                        | 272 (3.5)           | 269 (4.0)         | 2988 (3.8)          | 3556 (3.5)        |

<sup>1</sup> The denominator is AMI patients in each strata, i.e., black female, black male, white female, and white male.

<sup>2</sup> The denominator is AMI patients who underwent **coronary angiography** in each strata, i.e., black female, black male, white female, and white male.
