# Supplementary material for: Trends in and disparities for acute myocardial infarction: an analysis of Medicare claims data from 1992 to 2010
Source: Springer Nature journal article supplement (doi:10.1186/s12916-014-0190-6), 2014-10-22
Supplement: MOESM3 [file 9758534]

**Additional file 3.** Percentage of White and Black Men and Women who underwent percutaneous coronary intervention (PCI) within 30-day of admission for AMI

|                                                                                                                                                 | <b>BLACK FEMALE</b> | <b>BLACK MALE</b> | <b>WHITE FEMALE</b> | <b>WHITE MALE</b> |
|-------------------------------------------------------------------------------------------------------------------------------------------------|---------------------|-------------------|---------------------|-------------------|
| <b>Number (%)</b>                                                                                                                               |                     |                   |                     |                   |
| <b>Percent of all PCI in 30-day period that were performed during the index admission for initial AMI<sup>1</sup></b>                           |                     |                   |                     |                   |
| 1992-1993                                                                                                                                       | 857 (61.5)          | 754 (60.7)        | 14567 (52.0)        | 19915 (54.2)      |
| 1994-1995                                                                                                                                       | 1241 (61.8)         | 1120 (63.4)       | 19519 (53.6)        | 26582 (56.5)      |
| 1996-1997                                                                                                                                       | 1600 (64.4)         | 1329 (62.7)       | 24381 (56.9)        | 31498 (58.9)      |
| 1998-1999                                                                                                                                       | 1841 (64.4)         | 1497 (64.1)       | 28156 (59.3)        | 35960 (61.2)      |
| 2000-2001                                                                                                                                       | 2330 (68.6)         | 2026 (67.1)       | 33527 (62.1)        | 42653 (64.4)      |
| 2002-2003                                                                                                                                       | 2916 (70.5)         | 2607 (71.8)       | 40308 (67.9)        | 51497 (70.0)      |
| 2004-2005                                                                                                                                       | 2972 (75.1)         | 2802 (77.8)       | 40402 (73.8)        | 52304 (75.8)      |
| 2007-2008                                                                                                                                       | 2999 (80.0)         | 2926 (82.1)       | 40387 (80.9)        | 54283 (82.7)      |
| 2009-2010                                                                                                                                       | 3315 (84.7)         | 3148 (84.4)       | 38285 (84.4)        | 53819 (85.8)      |
| <b>Percent of all PCI in 30-day period that were performed after transfer to another hospital<sup>2</sup></b>                                   |                     |                   |                     |                   |
| 1992-1993                                                                                                                                       | 419 (30.1)          | 377 (30.3)        | 10967 (39.2)        | 13414 (36.5)      |
| 1994-1995                                                                                                                                       | 613 (30.5)          | 516 (29.2)        | 13971 (38.4)        | 16617 (35.3)      |
| 1996-1997                                                                                                                                       | 713 (28.7)          | 648 (30.6)        | 15327 (35.7)        | 17899 (33.5)      |
| 1998-1999                                                                                                                                       | 814 (28.4)          | 669 (28.6)        | 16011 (33.7)        | 18678 (31.8)      |
| 2000-2001                                                                                                                                       | 889 (26.2)          | 808 (26.8)        | 16971 (31.4)        | 19336 (29.2)      |
| 2002-2003                                                                                                                                       | 984 (23.8)          | 812 (22.4)        | 15575 (26.3)        | 17848 (24.2)      |
| 2004-2005                                                                                                                                       | 781 (19.7)          | 591 (16.4)        | 11365 (20.8)        | 12919 (18.7)      |
| 2007-2008                                                                                                                                       | 585 (15.6)          | 454 (12.7)        | 7079 (14.2)         | 8118 (12.4)       |
| 2009-2010                                                                                                                                       | 424 (10.8)          | 398 (10.7)        | 5182 (11.4)         | 6293 (10.0)       |
| <b>Percent of all PCI in 30-day period that were performed during a different admission (but within 30-day of the onset of AMI)<sup>2</sup></b> |                     |                   |                     |                   |
| 1992-1993                                                                                                                                       | 118 (8.5)           | 112 (9.0)         | 2479 (8.9)          | 3414 (9.3)        |
| 1994-1995                                                                                                                                       | 155 (7.7)           | 132 (7.5)         | 2916 (8.0)          | 3858 (8.2)        |
| 1996-1997                                                                                                                                       | 170 (6.9)           | 143 (6.8)         | 3177 (7.4)          | 4098 (7.6)        |
| 1998-1999                                                                                                                                       | 206 (7.2)           | 169 (7.2)         | 3339 (7.0)          | 4108 (7.0)        |
| 2000-2001                                                                                                                                       | 179 (5.3)           | 185 (6.1)         | 3483 (6.5)          | 4200 (6.5)        |
| 2002-2003                                                                                                                                       | 234 (5.7)           | 214 (5.9)         | 3448 (5.8)          | 4275 (5.8)        |
| 2004-2005                                                                                                                                       | 203 (5.1)           | 209 (5.8)         | 3009 (5.5)          | 3750 (5.4)        |
| 2007-2008                                                                                                                                       | 164 (4.4)           | 184 (5.2)         | 2472 (5.0)          | 3271 (5.0)        |
| 2009-2010                                                                                                                                       | 177 (4.5)           | 182 (4.9)         | 1908 (4.2)          | 2593 (4.1)        |

<sup>1</sup> The denominator is AMI patients in each strata, i.e., black female, black male, white female, and white male.

<sup>2</sup> The denominator is AMI patients who underwent PTCA in each strata, i.e., black female, black male, white female, and white male.
