# Supplementary material for: Trends in and disparities for acute myocardial infarction: an analysis of Medicare claims data from 1992 to 2010
Source: Springer Nature journal article supplement (doi:10.1186/s12916-014-0190-6), 2014-10-22
Supplement: MOESM4 [file 9758534]

**Additional file 4.** Percentage of White and Black Men and Women who underwent Coronary Artery Bypass Graft (CABG) within 30-day after admission for AMI

|                                                                                                                                                  | <b>BLACK FEMALE</b> | <b>BLACK MALE</b> | <b>WHITE FEMALE</b> | <b>WHITE MALE</b> |
|--------------------------------------------------------------------------------------------------------------------------------------------------|---------------------|-------------------|---------------------|-------------------|
| <b>Percent of all CABG in 30-day period that were performed during the index admission for initial AMI<sup>1</sup></b>                           |                     |                   |                     |                   |
| 1992-1993                                                                                                                                        | 519 (51.3)          | 435 (47.3)        | 7747 (40.7)         | 14152 (42.2)      |
| 1994-1995                                                                                                                                        | 624 (48.9)          | 647 (51.6)        | 9537 (41.4)         | 17294 (43.5)      |
| 1996-1997                                                                                                                                        | 713 (49.1)          | 729 (52.0)        | 10868 (43.5)        | 19127 (45.8)      |
| 1998-1999                                                                                                                                        | 766 (51.7)          | 703 (52.9)        | 10541 (46.6)        | 18400 (48.7)      |
| 2000-2001                                                                                                                                        | 871 (54.3)          | 770 (52.7)        | 10617 (49.2)        | 18859 (51.4)      |
| 2002-2003                                                                                                                                        | 913 (58.2)          | 905 (58.5)        | 10726 (54.6)        | 19471 (56.9)      |
| 2004-2005                                                                                                                                        | 704 (60.7)          | 787 (63.0)        | 8822 (60.6)         | 16693 (63.4)      |
| 2007-2008                                                                                                                                        | 604 (64.5)          | 697 (65.5)        | 7369 (66.2)         | 14595 (68.7)      |
| 2009-2010                                                                                                                                        | 565 (68.1)          | 648 (67.9)        | 5883 (66.8)         | 12332 (69.4)      |
| <b>Percent of all CABG in 30-day period that were performed after transfer to another hospital<sup>2</sup></b>                                   |                     |                   |                     |                   |
| 1992-1993                                                                                                                                        | 382 (37.8)          | 353 (38.4)        | 9065 (47.6)         | 14901 (44.5)      |
| 1994-1995                                                                                                                                        | 500 (39.2)          | 461 (36.8)        | 10834 (47.0)        | 17742 (44.7)      |
| 1996-1997                                                                                                                                        | 577 (39.7)          | 516 (36.8)        | 11498 (46.0)        | 18039 (43.2)      |
| 1998-1999                                                                                                                                        | 565 (38.1)          | 491 (37.0)        | 9790 (43.3)         | 15647 (41.4)      |
| 2000-2001                                                                                                                                        | 579 (36.1)          | 530 (36.3)        | 8905 (41.3)         | 14371 (39.2)      |
| 2002-2003                                                                                                                                        | 495 (31.6)          | 520 (33.6)        | 7364 (37.5)         | 11900 (34.8)      |
| 2004-2005                                                                                                                                        | 364 (31.4)          | 363 (29.0)        | 4671 (32.1)         | 7636 (29.0)       |
| 2007-2008                                                                                                                                        | 242 (25.8)          | 272 (25.6)        | 2956 (26.6)         | 5107 (24.0)       |
| 2009-2010                                                                                                                                        | 194 (23.4)          | 218 (22.9)        | 2248 (25.5)         | 4072 (22.9)       |
| <b>Percent of all CABG performed in 30-day period that were during a different admission (but within 30-day of the onset of AMI)<sup>2</sup></b> |                     |                   |                     |                   |
| 1992-1993                                                                                                                                        | 110 (10.9)          | 131 (14.3)        | 2246 (11.8)         | 4455 (13.3)       |
| 1994-1995                                                                                                                                        | 153 (12.0)          | 146 (11.6)        | 2676 (11.6)         | 4703 (11.8)       |
| 1996-1997                                                                                                                                        | 163 (11.2)          | 157 (11.2)        | 2640 (10.6)         | 4623 (11.1)       |
| 1998-1999                                                                                                                                        | 152 (10.3)          | 135 (10.2)        | 2295 (10.1)         | 3749 (9.9)        |
| 2000-2001                                                                                                                                        | 153 (9.5)           | 161 (11.0)        | 2045 (9.5)          | 3460 (9.4)        |
| 2002-2003                                                                                                                                        | 161 (10.3)          | 122 (7.9)         | 1564 (8.0)          | 2855 (8.3)        |
| 2004-2005                                                                                                                                        | 92 (7.9)            | 100 (8.0)         | 1067 (7.3)          | 2013 (7.6)        |
| 2007-2008                                                                                                                                        | 91 (9.7)            | 95 (8.9)          | 800 (7.2)           | 1547 (7.3)        |
| 2009-2010                                                                                                                                        | 71 (8.6)            | 88 (9.2)          | 675 (7.7)           | 1369 (7.7)        |

<sup>1</sup> The denominator is AMI patients in each strata, i.e., black female, black male, white female, and white male.

<sup>2</sup> The denominator is AMI patients who underwent CABG in each strata, i.e., black female, black male, white female, and white male.
